# Supplementary material for: Gender perspective in psoriasis: a scoping review and proposal of strategies for improved clinical practice by European dermatologists
Source: PubMed Central journal article supplement — Int J Womens Dermatol. 2023 Nov 1;9(4):e112. doi: 10.1097/JW9.0000000000000112 (PMC10615520; doi:10.1097/jw9.0000000000000112), 2023-11-01
Supplement: jw9-9-e112-s001.pdf [file jw9-9-e112-s001.pdf]

**Table Suppl 1. Search strategies in PubMed and Cochrane Library.**

**PubMed**

| #  | Terms                                                                                                                                     | Records    |
|----|-------------------------------------------------------------------------------------------------------------------------------------------|------------|
| #1 | "Sex"[Mesh] OR "Gender Equity"[Mesh] OR "Sex Characteristics"[Mesh] OR "Sexism"[Mesh] OR "Sex Factors"[Mesh]                              | 338,801    |
| #2 | Arthritis, Psoriatic/                                                                                                                     | 12,035     |
| #3 | (psoria* (arthrit* or arthropath*))                                                                                                       | 15,831     |
| #4 | Psoriasis/                                                                                                                                | 56,467     |
| #5 | psorias*                                                                                                                                  | 53,505     |
| #6 | ((chronic or plaque) psoriasis)                                                                                                           | 13,198     |
| #7 | ((((Arthritis, Psoriatic/) OR ((psoria* (arthrit* or arthropath*)))) OR (Psoriasis/)) OR (psorias*)) OR (((chronic or plaque) psoriasis)) | 59,532     |
| #8 | #7 AND #1                                                                                                                                 | <b>652</b> |

**Cochrane**

| #  | Terms                                  | Records  |
|----|----------------------------------------|----------|
| #1 | MeSH descriptor [Gender Identity]      | 259      |
| #2 | MeSH descriptor [Sex]                  | 35       |
| #3 | MeSH descriptor [Sex factors]          | 5992     |
| #4 | MeSH descriptor [Sexism]               | 26       |
| #5 | #1 OR #2 OR #3 OR #4                   | 5992     |
| #6 | MeSH descriptor [Arthritis, Psoriatic] | 494      |
| #7 | MeSH descriptor [Psoriasis]            | 3528     |
| #8 | #6 OR #7                               | 3528     |
| #9 | #5 AND #8                              | <b>9</b> |
