# Supplementary figures and images for: Gender perspective in psoriasis: a scoping review and proposal of strategies for improved clinical practice by European dermatologists
Source: PubMed Central journal article supplement — Int J Womens Dermatol. 2023 Nov 1;9(4):e112. doi: 10.1097/JW9.0000000000000112 (PMC10615520; doi:10.1097/jw9.0000000000000112), 2023-11-01

**Figure Suppl 1. Flow diagram of studies recovered and included.**

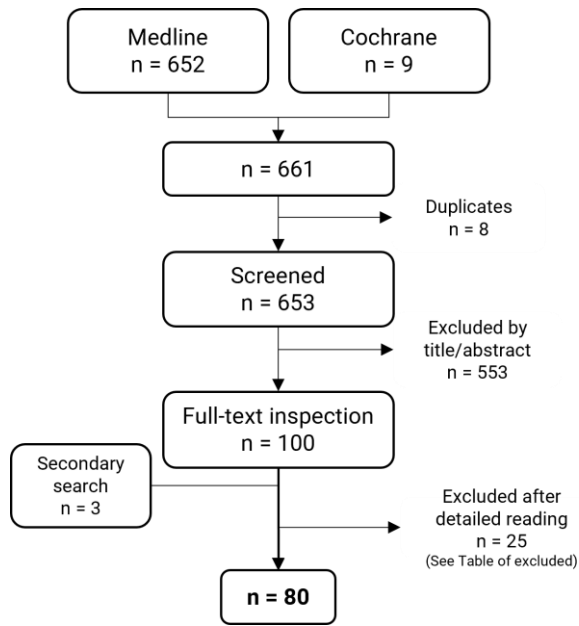

Supplement: jw9-9-e112-s002.pdf [file jw9-9-e112-s002.pdf]

Figure Suppl 2. European countries of panel members

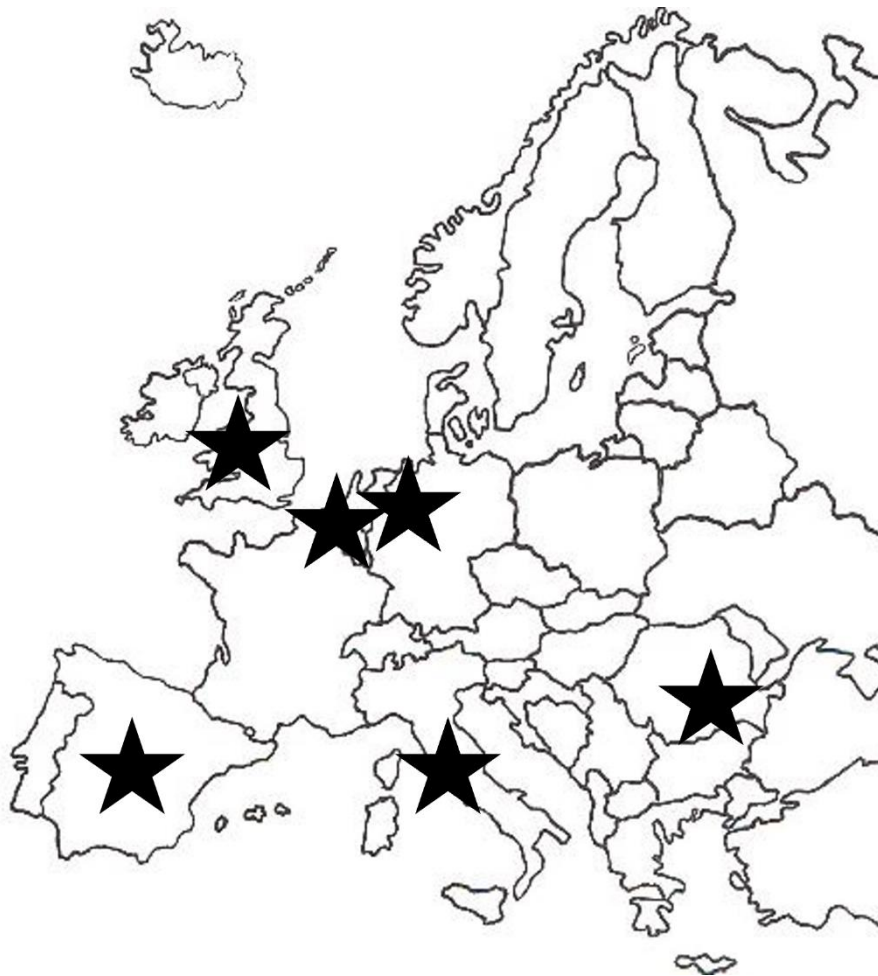

Supplement: jw9-9-e112-s003.pdf [file jw9-9-e112-s003.pdf]
